# Supplementary material for: Progesterone Receptor Expression Level Predicts Prognosis of Estrogen Receptor-Positive/HER2-Negative Young Breast Cancer: A Single-Center Prospective Cohort Study
Source: MDPI journal article supplement (doi:10.3390/cancers15133435), 2023-06-30
Supplement: s1 [file s1]

Table S1. Pathologic stage according to neoadjuvant chemotherapy.

| p stage (without neoadjuvant chemotherapy) |                               |                          |                              |         |
|--------------------------------------------|-------------------------------|--------------------------|------------------------------|---------|
|                                            | Strong-PR<br>(n = 318, 89.6%) | Low-PR<br>(n = 13, 3.7%) | PR-negative<br>(n=24, 6.8%)  | p value |
| pT                                         |                               |                          |                              |         |
| T1                                         | 180 (56.6)                    | 6 (46.2)                 | 14 (58.3)                    | 0.4250  |
| T2                                         | 119 (37.4)                    | 5 (38.5)                 | 10 (41.7)                    |         |
| T3                                         | 19 (6.0)                      | 2 (15.4)                 | 0 (0.0)                      |         |
| pN                                         |                               |                          |                              |         |
| N0                                         | 200 (62.9)                    | 7 (53.8)                 | 19 (79.2)                    | 0.0420  |
| N1                                         | 86 (27.0)                     | 3 (23.1)                 | 4 (16.7)                     |         |
| N2                                         | 25 (7.9)                      | 0 (0.0)                  | 1 (4.2)                      |         |
| N3                                         | 7 (2.2)                       | 3 (23.1)                 | 0 (0.0)                      |         |
| pStage                                     |                               |                          |                              |         |
| I                                          | 147 (46.2)                    | 5 (38.5)                 | 12 (50.0)                    | 0.5700  |
| II                                         | 132 (41.5)                    | 5 (38.5)                 | 11 (45.8)                    |         |
| III                                        | 39 (12.3)                     | 3 (23.1)                 | 1 (4.2)                      |         |
|                                            |                               |                          |                              |         |
| yp stage (with neoadjuvant chemotherapy)   |                               |                          |                              |         |
|                                            | Strong-PR<br>(n=68, 66.0%)    | Low-PR<br>(n=13, 12.6%)  | PR-negative<br>(n=22, 21.4%) | p value |
| ypT                                        |                               |                          |                              |         |
| pCR                                        | 4 (5.9)                       | 2 (15.4)                 | 3 (13.6)                     | 0.6670  |
| T1                                         | 30 (44.1)                     | 6 (46.2)                 | 12 (54.5)                    |         |
| T2                                         | 23 (33.8)                     | 4 (30.8)                 | 5 (22.7)                     |         |
| T3                                         | 11 (16.2)                     | 1 (7.7)                  | 2 (9.1)                      |         |
| ypN                                        |                               |                          |                              |         |
| N0                                         | 19 (27.9)                     | 5 (38.5)                 | 12 (54.5)                    | 0.3820  |
| N1                                         | 27 (39.7)                     | 5 (38.5)                 | 7 (31.8)                     |         |
| N2                                         | 15 (22.1)                     | 3 (23.1)                 | 2 (9.1)                      |         |
| N3                                         | 7 (10.3)                      | 0 (0.0)                  | 1 (4.5)                      |         |
| ypStage                                    |                               |                          |                              |         |
| pCR                                        | 4 (5.9)                       | 2 (15.4)                 | 3 (13.6)                     | 0.2820  |
| I                                          | 12 (17.6)                     | 2 (15.4)                 | 8 (36.4)                     |         |
| II                                         | 27 (39.7)                     | 5 (38.5)                 | 7 (31.8)                     |         |
| III                                        | 25 (36.8)                     | 4 (30.8)                 | 4 (18.2)                     |         |
